# Supplementary material for: Transcriptome analysis of Sonneratia caseolaris seedlings under chilling stress
Source: PeerJ journal article supplement (doi:10.7717/peerj.11506), 2021-06-03

**A**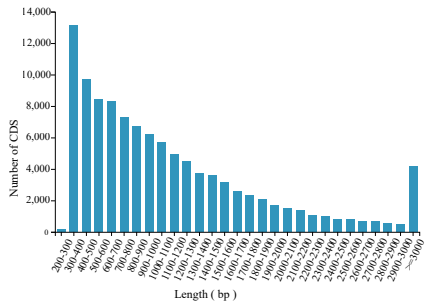**B**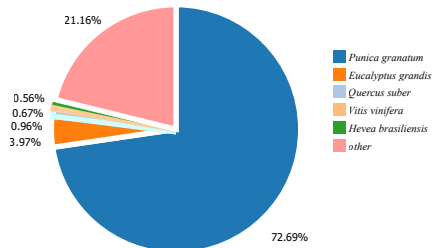**C**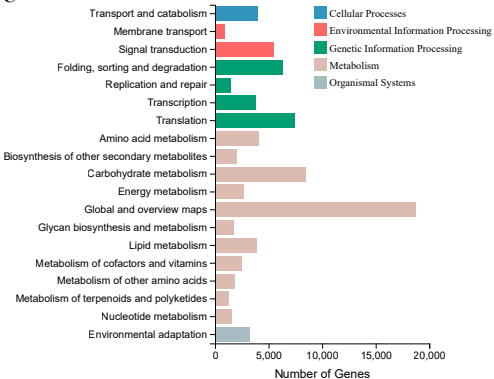**D**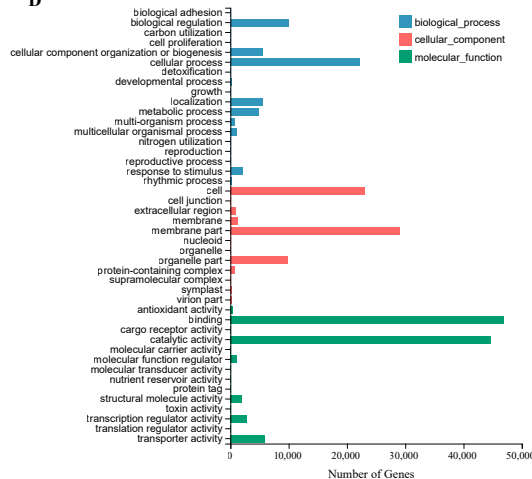

Supplement: Figure_S1.pdf [file Figure_S1.pdf]
