# Supplementary material for: Transcriptome analysis of Sonneratia caseolaris seedlings under chilling stress
Source: PeerJ journal article supplement (doi:10.7717/peerj.11506), 2021-06-03

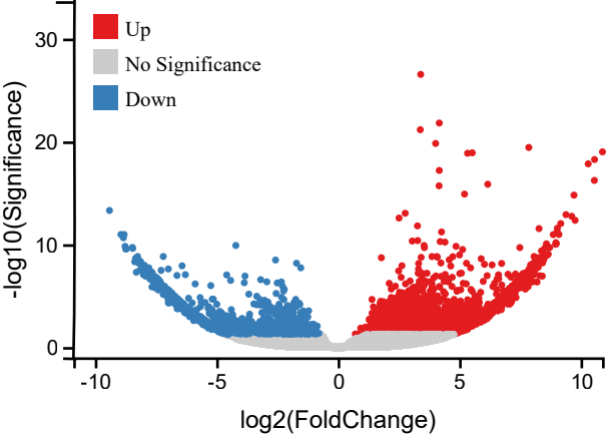

Supplement: Figure_S2.pdf [file Figure_S2.pdf]
