# Supplementary material for: Transcriptome analysis of Sonneratia caseolaris seedlings under chilling stress
Source: PeerJ. 2021 Jun 3;9:e11506. doi: 10.7717/peerj.11506 (PMC8180195; doi:10.7717/peerj.11506)
Supplement: Supplemental Information 6 [file peerj-09-11506-s006.xlsx]

## Sheet: the electrolyte leakage
CK
E0	2.69		2.72		2.71
E1	6.8		6.73		7.75
E2	71.19	0.06	61.69	0.0680007	76.9	0.0679337
3h
E0	2.89		2.68		2.66
E1	78.06		46.15		64.81
E2	504	0.150007	489	0.0893856	492	0.127008
6h
E0	3.86		3.49		3.55
E1	113.3		76.91		87.61
E2	568	0.193994	564	0.130988	553	0.152989
12h
E0	3.09		2.96		2.92
E1	26.77		36.39		25.59
E2	154.9	0.155984	149.6	0.227973	151.1	0.15299
24h
E0	2.77		2.61		2.76
E1	70.16		64.95		89.34
E2	259	0.263006	255	0.246999	253	0.345988
0h	0.06	0.0680007	0.0679337	0.0653115	6.53115	0.00459998	0.459998
3h	0.149947	0.0893856	0.127417	0.12225	12.225	0.0306096	3.06096
6h	0.193994	0.130988	0.153481	0.159488	15.9488	0.0319299	3.19299
12h	0.155984	0.227973	0.15299	0.178982	17.8982	0.0424537	4.24537
24h	0.263006	0.246999	0.345988	0.285331	28.5331	0.0531368	5.31368
	0.246999	24.6999
	0.345988	34.5988

## Sheet: MDA
0h	A532	A600
	0.08	0.069	0.011	2.838
	0.07	0.065	0.005	1.075
	0.094	0.084	0.01	2.58
3h	A532	A600
	0.086	0.066	0.02	5.16
	0.075	0.047	0.028	6.02
	0.09	0.073	0.017	3.98727
6h	A532	A600
	0.129	0.076	0.053	10.5185
	0.119	0.076	0.043	10.0855
	0.109	0.073	0.036	7.74
12h	A532	A600
	0.128	0.073	0.055	10.9154
	0.117	0.065	0.052	12.1964
	0.119	0.077	0.042	9.03
24h	A532	A600
	0.129	0.07	0.059	13.8382
	0.15	0.076	0.074	15.91
	0.124	0.077	0.047	11.985
0	2.838	1.075	2.58	2.16433	0.952169
3h	5.16	6.02	3.98727	5.05576	1.02037
6h	10.5185	10.0855	7.74	9.44797	1.49491
12h	10.9154	12.1964	9.03	10.7139	1.59277
24h	13.8382	15.91	11.985	13.9111	1.96351

## Sheet: souble sugars
0h	A620
	0.229	0.125	2.2815
	0.242	0.138	2.4336
	0.348	0.244	3.6738
blank control	0.104
3h	A620
	0.368	0.276	4.0482
	0.398	0.306	4.3992
	0.388	0.296	4.2822
blank control	0.092
6h	A620
	0.439	0.347	4.8789
	0.398	0.306	4.3992
	0.485	0.393	5.4171
blank control	0.092
12h	A620
	0.605	0.513	6.8211
	0.488	0.396	5.4522
	0.484	0.392	5.4054
blank control	0.092
24h	A620
	0.66	0.591	7.7337
	0.536	0.467	6.2829
	0.82	0.751	9.6057
blank control	0.069
0	2.2815	2.4336	3.6738	2.7963	0.763733
3h	4.0482	4.3992	4.2822	4.2432	0.17872
6h	4.8789	4.3992	5.4171	4.8984	0.50923
12h	6.8211	5.4522	5.4054	5.8929	0.804185
24h	7.7337	6.2829	9.6057	7.8741	1.66584

## Sheet: souble proteins
	A562
blank control	0.596
stand sbustance	1.274	0.678
1/10 sample
0h	0.133	1.33	5.41298
	0.136	1.36	5.63422
	0.154	1.54	6.96165
3h	0.21	2.1	11.0914
	0.211	2.11	11.1652
	0.215	2.15	11.4602
6h	0.262	2.62	14.9263
	0.283	2.83	16.4749
	0.269	2.69	15.4425
12h
	0.343	3.43	20.8997
	0.453	4.53	29.0118
	0.398	3.98	24.9558
24h
	0.554	5.54	36.4602
	0.504	5.04	32.7729
	0.498	4.98	32.3304
0	5.41298	5.63422	6.96165	6.00295	0.837597
3h	11.0914	11.1652	11.4602	11.2389	0.195114
6h	14.9263	16.4749	15.4425	15.6146	0.788545
12h	20.8997	29.0118	24.9558	24.9558	4.05605
24h	36.4602	32.7729	32.3304	33.8545	2.26742
