# Supplementary material for: Transcriptome analysis of Sonneratia caseolaris seedlings under chilling stress
Source: PeerJ. 2021 Jun 3;9:e11506. doi: 10.7717/peerj.11506 (PMC8180195; doi:10.7717/peerj.11506)
Supplement: Supplemental Information 7 [file peerj-09-11506-s007.xlsx]

## Sheet: Sheet1
	Actin	CL10456	CL934	Unigene30041	CL355	CL14150	CL2626	CL4125	CL9193	CL4581	CL2232	CL1346	CL2285
CK	26.19	28.76	28.57	29.65	27.52	28.66	26.96	27.21	26.16	26.59	26.33	28.08	27.87
CK	25.97	28.52	28.87	29.8	27.87	28.57	26.93	27.34	26.15	26.6	26.32	28.12	27.94
CK	26	28.49	28.94	29.59	26.95	28.78	26.98	27.32	26.31	26.41	26.17	28.02	28.05
CT	25.69	25.37	20.85	22.66	21.68	22.89	21.9	19.68	23.37	25.73	25.57	25.22	23.55
CT	25.54	25.16	21.01	22.58	21.89	23.3	22.17	19.66	23.94	25.38	25.37	25.47	23.15
CT	25.93	25.06	20.95	22.46	21.25	23.17	21.84	19.76	23.61	25.51	25.62	25.21	22.4
		△CT=CT目的基因-Ct内参基因
		CL10456	CL934	Unigene30041	CL355	CL14150	CL2626	CL4125	CL9193	CL4581	CL2232	CL1346	CL2285
CK		2.57	-0.19	0.89	-1.24	-0.1	-1.8	-1.55	-2.6	-2.17	-2.43	-0.68	-0.89
CK		2.55	0.35	1.28	-0.65	0.05	-1.59	-1.18	-2.37	-1.92	-2.2	-0.4	-0.58
CK		2.49	0.45	1.1	-1.54	0.29	-1.51	-1.17	-2.18	-2.08	-2.32	-0.47	-0.44
CT		-0.32	-4.52	-2.71	-3.69	-2.48	-3.47	-5.69	-2	0.36	0.2	-0.15	-1.82
CT		-0.38	-4.15	-2.58	-3.27	-1.86	-2.99	-5.5	-1.22	0.22	0.21	0.31	-2.01
CT		-0.87	-4.11	-2.6	-3.81	-1.89	-3.22	-5.3	-1.45	0.45	0.56	0.15	-2.66
		△△CT=△CT实验-△CT对照
		CL10456	CL934	Unigene30041	CL355	CL14150	CL2626	CL4125	CL9193	CL4581	CL2232	CL1346	CL2285
		0	0	0	0	0	0	0	0	0	0	0	0
		0	0	0	0	0	0	0	0	0	0	0	0
		0	0	0	0	0	0	0	0	0	0	0	0
		-2.89	-4.33	-3.6	-2.45	-2.38	-1.67	-4.14	0.6	2.53	2.63	0.53	-0.93
		-2.93	-4.5	-3.86	-2.62	-1.91	-1.4	-4.32	1.15	2.14	2.41	0.71	-1.43
		-3.36	-4.56	-3.7	-2.27	-2.18	-1.71	-4.13	0.73	2.53	2.88	0.62	-2.22
		扩增倍数=2-△△CT
		CL10456	CL934	Unigene30041	CL355	CL14150	CL2626	CL4125	CL9193	CL4581	CL2232	CL1346	CL2285
		1	1	1	1	1	1	1	1	1	1	1	1
		1	1	1	1	1	1	1	1	1	1	1	1
		1	1	1	1	1	1	1	1	1	1	1	1
		1	1	1	1	1	1	1	1	1	1	1	1
		7.4127	20.1122	12.1257	5.46416	5.20537	3.18215	17.6305	0.659754	0.173139	0.161544	0.692555	1.90528
		7.6211	22.6274	14.5203	6.1475	3.75809	2.63902	19.9733	0.450625	0.22688	0.188156	0.61132	2.69447
		10.2674	23.5883	12.996	4.82323	4.53154	3.27161	17.5087	0.602904	0.173139	0.135842	0.650671	4.65893
		8.43374	22.1093	13.214	5.4783	4.49833	3.03092	18.3708	0.571094	0.191052	0.161847	0.651515	3.08623
		1.59142	1.79503	1.21208	0.662248	0.724209	0.342337	1.38911	0.108132	0.0310274	0.0261583	0.0406239	1.41801
		0.918806	1.03636	0.699794	0.382349	0.418122	0.197648	0.802004	0.0624302	0.0179137	0.0151025	0.0234542	0.818691
